# Supplementary material for: Misfolded SOD1 inclusions in patients with mutations in C9orf72 and other ALS/FTD-associated genes
Source: PubMed Central journal article supplement — J Neurol Neurosurg Psychiatry. 2019 Apr 16;90(8):861–9. doi: 10.1136/jnnp-2018-319386 (PMC6691870; doi:10.1136/jnnp-2018-319386), 2019-04-16
Supplement: jnnp-2018-319386supp001.pdf [file jnnp-2018-319386supp001.pdf]

| <b>Case</b> | <b>Cause of death</b>                   | <b>Age at death</b> | <b>F/M</b> | <b>P.M.</b> |
|-------------|-----------------------------------------|---------------------|------------|-------------|
| 47          | Alzheimer's Disease                     | 54                  | F          | 3           |
| 48          | Parkinson's Disease                     | 80                  | F          | 1           |
| 49          | Alzheimer's Disease                     | 77                  | F          | 3           |
| 50          | Status EP after Stroke                  | 73                  | M          | 1           |
| 51          | Dementia (AD?)                          | 81                  | F          | 2           |
| 52          | Parkinson's Disease                     | 83                  | M          | 3           |
| 53          | Parkinson's Disease                     | 81                  | F          | 2           |
| 54          | Alzheimer's Disease                     | 86                  | M          | 1           |
| 55          | Parkinson's Disease                     | 75                  | M          | 3           |
| 56          | Parkinson's Disease                     | 87                  | M          | 2           |
| 57          | Aorta aneurysm rupture                  | 57                  | M          | 2           |
| 58          | Myocardial infarction                   | 79                  | F          | 2           |
| 59          | Leiomyoma                               | 63                  | F          | 2           |
| 60          | Aorta dissection, Myocardial infarction | 66                  | M          | 2           |
| 61          | Myocardial infarction                   | 80                  | F          | N.A.        |
| 62          | Myocardial infarction                   | 56                  | F          | 3           |
| 63          | Myocardial infarction                   | 63                  | F          | 3           |
| 64          | Pulmonary fibrosis, liver cirrhosis     | 84                  | M          | 3           |
| 65          | Myocardial infarction                   | 87                  | F          | 2           |
| 66          | Myocardial infarction                   | 54                  | M          | 3           |
| 67          | Myocardial infarction                   | 80                  | M          | 3           |
| 68          | Pancreatic cancer                       | 49                  | M          | 2           |
| 69          | Gastric hemorrhage                      | 42                  | F          | 3           |
| 70          | Myocardial infarction                   | 50                  | M          | 3           |
| 71          | Mb. Paget                               | 74                  | F          | 2           |
| 72          | Myocardial infarction                   | 73                  | M          | 3           |
| 73          | Myocardial infarction                   | 79                  | M          | 1           |
| 74          | Pancreatic cancer                       | 36                  | F          | 3           |
| 75          | Prostate cancer                         | 77                  | M          | 3           |
| 76          | Myocardial infarction                   | 88                  | F          | 2           |

Supplementary Table 1: Causes of death in the two control cohorts: Cases 47-56 are neurodegenerative controls, cases 57-76 are non-neurological controls.

Age at death (years), F = female, M = male, P.M = Post mortem time (days), N.A not applicable
