# Supplementary material for: Misfolded SOD1 inclusions in patients with mutations in C9orf72 and other ALS/FTD-associated genes
Source: PubMed Central journal article supplement — J Neurol Neurosurg Psychiatry. 2019 Apr 16;90(8):861–9. doi: 10.1136/jnnp-2018-319386 (PMC6691870; doi:10.1136/jnnp-2018-319386), 2019-04-16
Supplement: jnnp-2018-319386supp006.pdf [file jnnp-2018-319386supp006.pdf]

## Supplementary Figure 2a and b

Micrographs showing lumbar spinal cord sections from patients with mutations in different ALS/FTD-causing genes (*C9orf72HRE*, *FUS*, *KIF5A*, *VAPB*, *ALSIN*, *NEK1*, *SOD1*) compared with similar prepared sections from control patients with other neurological diseases (Alzheimer's disease, Parkinson's disease, epilepsy after cerebral infarction) and non-neurological conditions (mostly myocardial infarction). All sections were stained with the aa131-153 Ra-ab recognizing misfolded SOD1 aggregates.

Scale bars: A-BD 100µm for all micrographs.
