# Supplementary material for: Misfolded SOD1 inclusions in patients with mutations in C9orf72 and other ALS/FTD-associated genes
Source: PubMed Central journal article supplement — J Neurol Neurosurg Psychiatry. 2019 Apr 16;90(8):861–9. doi: 10.1136/jnnp-2018-319386 (PMC6691870; doi:10.1136/jnnp-2018-319386), 2019-04-16
Supplement: jnnp-2018-319386supp007.pdf [file jnnp-2018-319386supp007.pdf]

Supplementary Table 2

| Case Number | ALS associated mutation or Control  | aa131-153 Ra-ab | aa57-72 Ra-ab |
|-------------|-------------------------------------|-----------------|---------------|
| 1           | <i>C9orf72HRE</i>                   | ++              | ++            |
| 2           | <i>C9orf72HRE</i>                   | +               | ++            |
| 3           | <i>C9orf72HRE</i>                   | ++              | ++            |
| 4           | <i>C9orf72HRE</i>                   | ++              | +++           |
| 5           | <i>C9orf72HRE</i>                   | +++             | +++           |
| 6           | <i>C9orf72HRE</i>                   | ++              | ++, +++       |
| 7           | <i>C9orf72HRE</i>                   | +, ++           | ++            |
| 8           | <i>C9orf72HRE</i>                   | ++, +++         | ++            |
| 9           | <i>C9orf72HRE</i>                   | ++              | ++            |
| 11          | <i>C9orf72HRE</i>                   | ++, +++         | +++           |
| 13          | <i>C9orf72HRE</i>                   | ++              | ++            |
| 14          | <i>C9orf72HRE</i>                   | +               | ++            |
| 15          | <i>C9orf72HRE</i>                   | +               | +             |
| 16          | <i>C9orf72HRE</i> +<br><i>KIF5A</i> | ++, +++         | +++           |
| 17          | <i>C9orf72HRE</i> +<br><i>KIF5A</i> | +, ++           | ++            |
| 18          | <i>C9orf72HRE</i> +<br><i>KIF5A</i> | ++              | ++            |
| 19          | <i>KIF5A</i>                        | ++              | ++            |
| 21          | <i>KIF5A</i>                        | +, ++           | +             |
| 22          | <i>KIF5A</i>                        | ++              | +, ++         |
| 23          | <i>KIF5A</i>                        | +               | ++            |
| 24          | <i>KIF5A</i>                        | ++              | ++            |
| 25          | <i>NEK1 R812X</i>                   | ++, +++         | ++            |
| 26          | <i>VAPB S160delS</i>                | ++              | ++            |
| 27          | <i>FUS R495X</i>                    | ++              | ++            |
| 28          | <i>FUS Q23L</i>                     | ++, +++         | ++, +++       |
| 29          | <i>ALSIN</i> + <i>KIF5A</i>         | ++              | ++            |
| 31          | <i>SOD1 A4V</i> + <i>KIF5A</i>      | ++              | ++            |
| 32          | <i>SOD1 G127X</i>                   | n.a.            | +             |
| 36          | <i>SOD1 G114A</i>                   | ++, +++         | ++            |
| 37          | <i>SOD1 D76Y</i>                    | ++              | ++            |
| 38          | <i>SOD1 D83G</i>                    | +               | +, ++         |
| 39          | <i>SOD1 D101G</i>                   | ++              | +, ++         |
| 41          | <i>SOD1 D90A</i>                    | ++              | ++            |
| 42          | <i>SOD1 D90A</i>                    | ++              | +++           |
| 43          | <i>SOD1 D90A</i>                    | ++, +++         | ++, +++       |
| 44          | <i>SOD1 D90A</i>                    | ++              | ++            |
| 45          | <i>SOD1 D90A</i>                    | ++              | ++, +++       |
| 46          | <i>SOD1 D90A</i>                    | ++, +           | ++            |
| 47          | N.D. Control                        | -               | -             |
| 48          | N.D. Control                        | +               | +             |
| 49          | N.D. Control                        | +               | +             |
| 50          | N.D. Control                        | ++              | ++            |

|    |                     |       |   |
|----|---------------------|-------|---|
| 51 | N.D. Control        | -     | - |
| 52 | N.D. Control        | +     | + |
| 53 | N.D. Control        | -     | - |
| 54 | N.D. Control        | -     | - |
| 55 | N.D. Control        | -     | - |
| 56 | N.D. Control        | -     | - |
| 57 | Non-neurol. control | -     | - |
| 58 | Non-neurol. control | -     | - |
| 59 | Non-neurol. control | -     | - |
| 60 | Non-neurol. control | +     | + |
| 61 | Non-neurol. control | -     | - |
| 62 | Non-neurol. control | -     | - |
| 63 | Non-neurol. control | -     | - |
| 64 | Non-neurol. control | -     | - |
| 65 | Non-neurol. control | -     | - |
| 66 | Non-neurol. control | 0+, + | + |
| 67 | Non-neurol. control | -     | - |
| 68 | Non-neurol. control | -     | - |
| 69 | Non-neurol. control | -     | - |
| 70 | Non-neurol. control | -     | - |
| 71 | Non-neurol. control | -     | - |
| 72 | Non-neurol. control | -     | - |
| 73 | Non-neurol. control | -     | - |
| 74 | Non-neurol. control | -     | - |
| 75 | Non-neurol. control | -     | - |
| 76 | Non-neurol. control | -     | - |

Supplementary Table 2: Comparative analysis of ALS/FTD and controls using the anti-SOD1 peptide antibodies aa131-153 and aa57-72 Ra-ab stained in parallel and examined independently by two neuropathologists (KF, TB) in a blinded set-up fashion. In cases when the two examiners assessed the sections differently, both ratings are shown.

---
