# Supplementary figures and images for: Misfolded SOD1 inclusions in patients with mutations in C9orf72 and other ALS/FTD-associated genes
Source: PubMed Central journal article supplement — J Neurol Neurosurg Psychiatry. 2019 Apr 16;90(8):861–9. doi: 10.1136/jnnp-2018-319386 (PMC6691870; doi:10.1136/jnnp-2018-319386), 2019-04-16

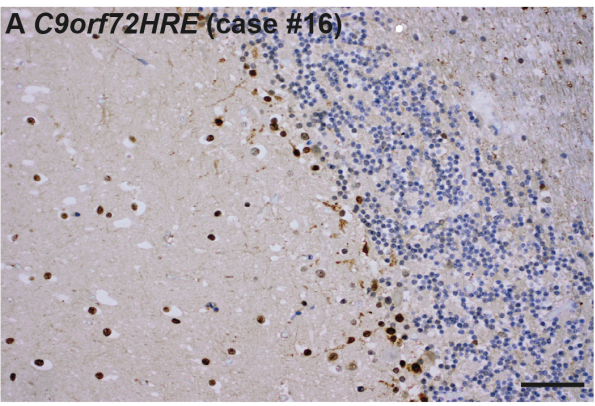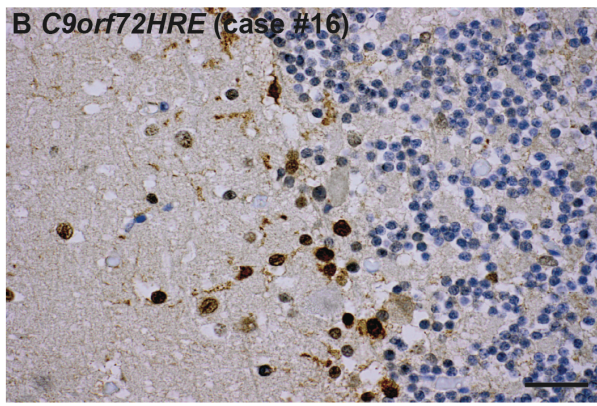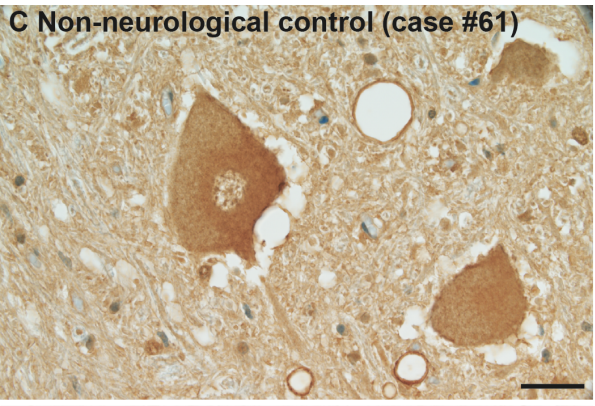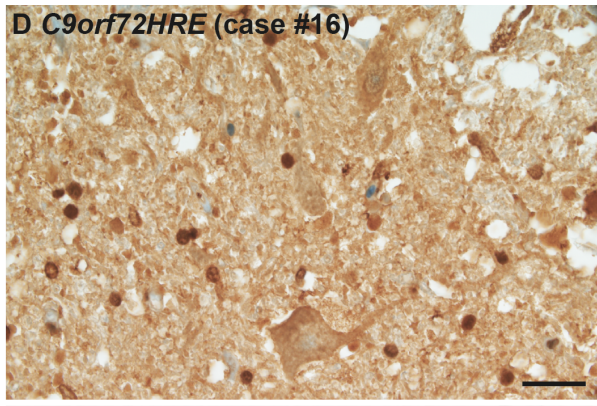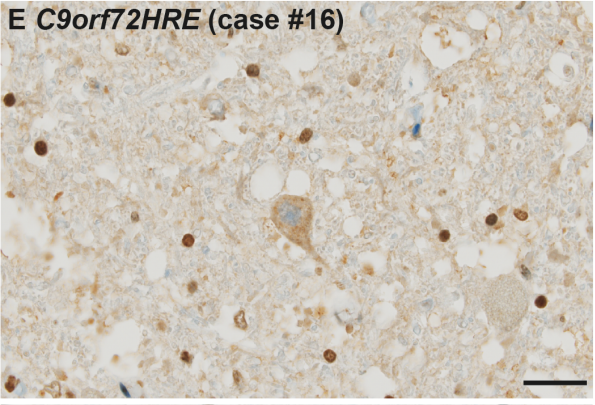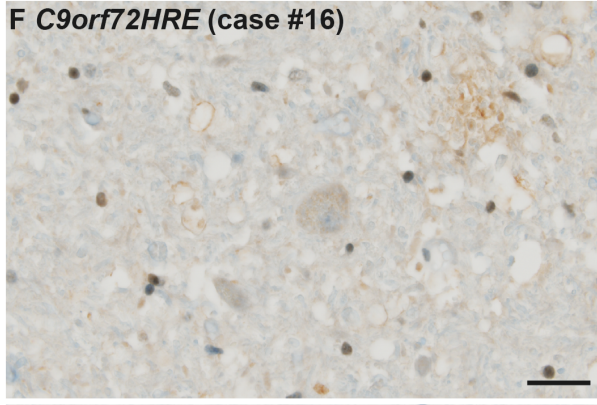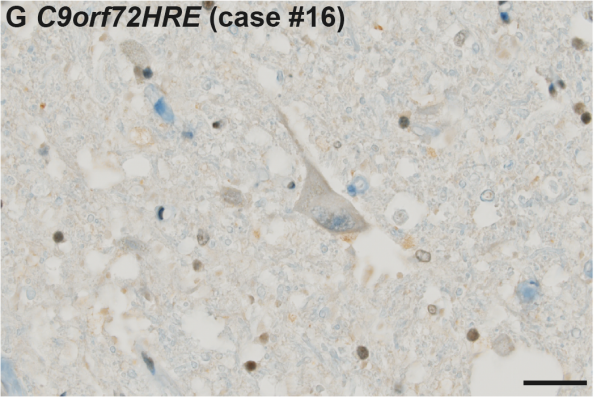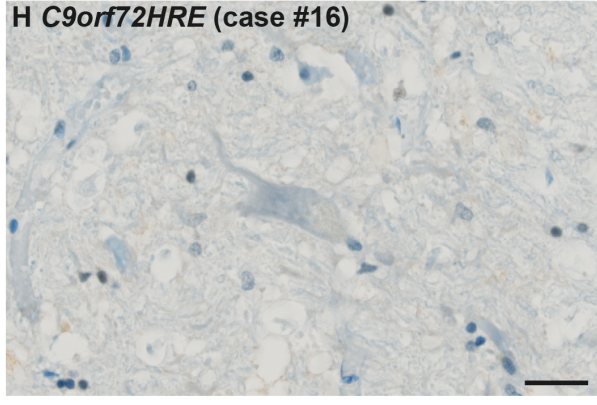

Supplement: jnnp-2018-319386supp002.pdf [file jnnp-2018-319386supp002.pdf]

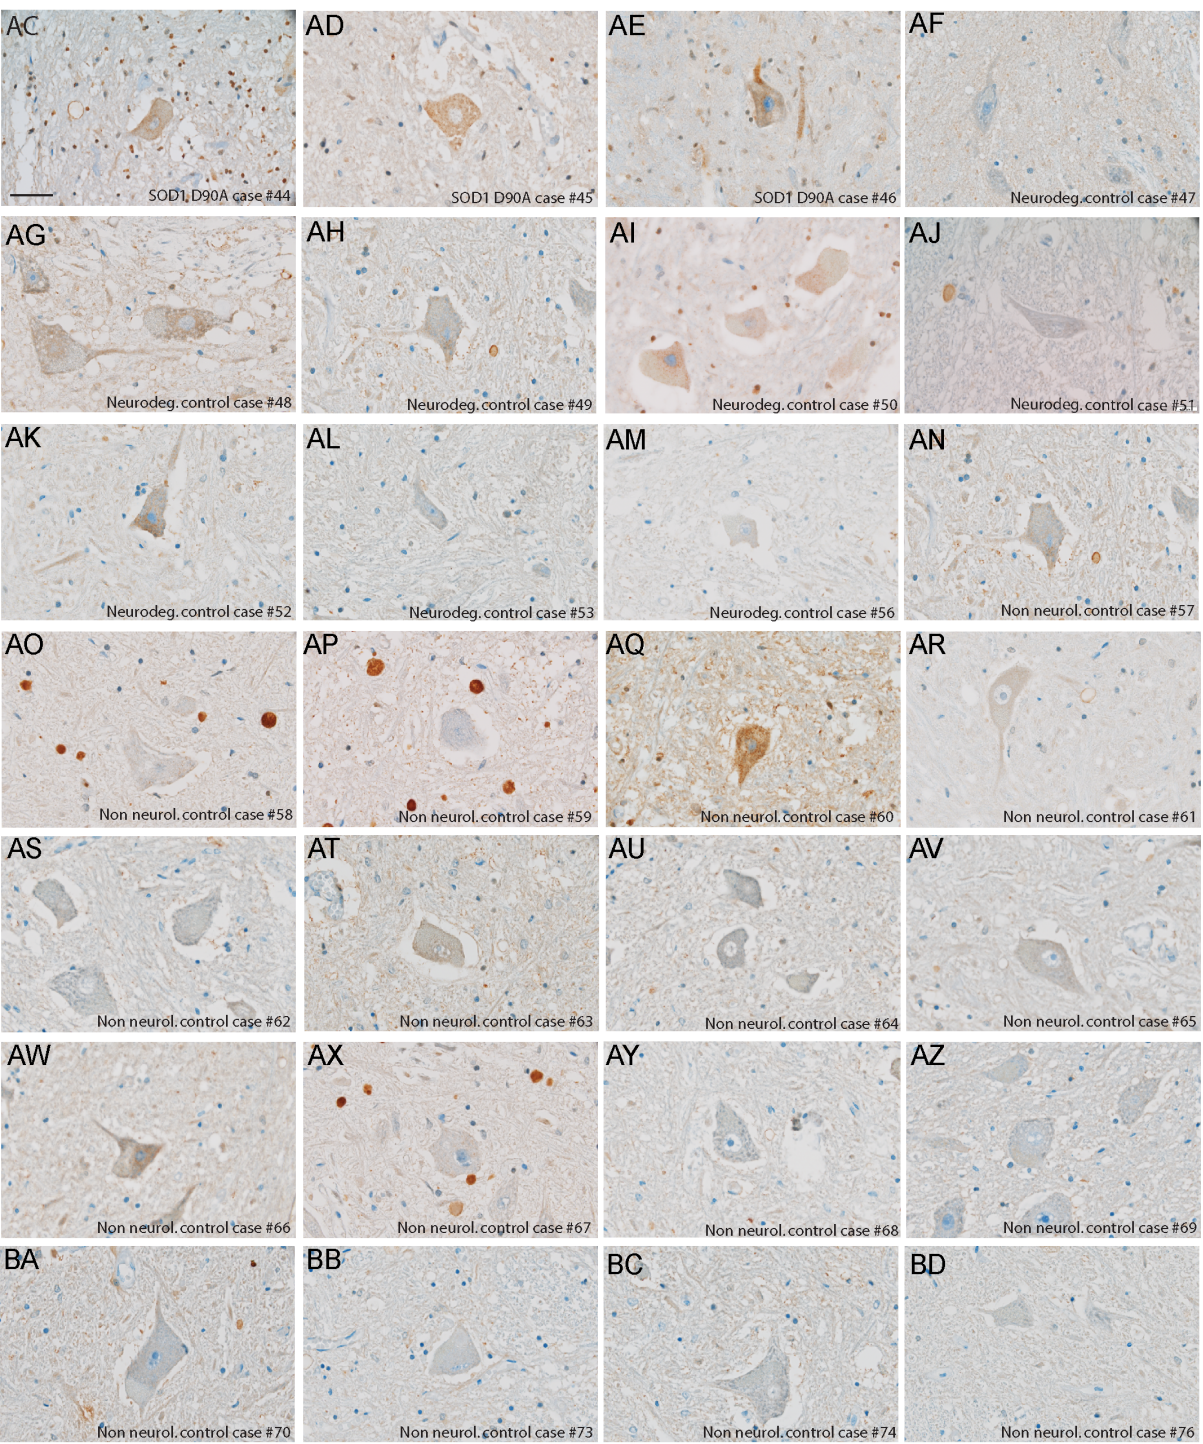

Supplement: jnnp-2018-319386supp005.pdf [file jnnp-2018-319386supp005.pdf]
